# Supplementary figures and images for: Reprogramming the body weight set point by a reciprocal interaction of hypothalamic leptin sensitivity and Pomc gene expression reverts extreme obesity
Source: PubMed Central journal article supplement — Mol Metab. 2016 Aug 5;5(10):869–81. doi: 10.1016/j.molmet.2016.07.012 (PMC5034612; doi:10.1016/j.molmet.2016.07.012), 2016-08-05

**A**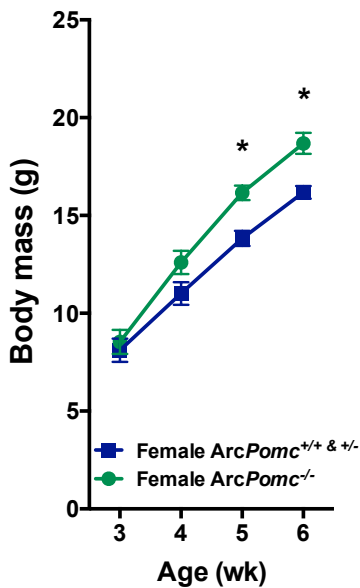**B**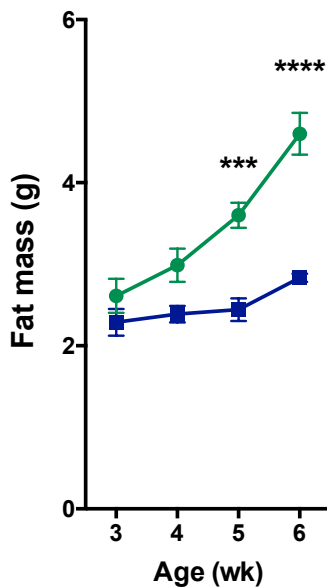**C**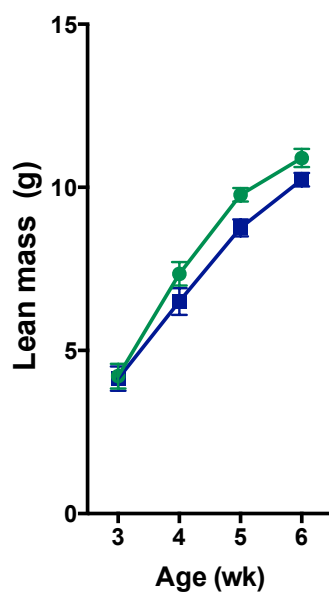**D**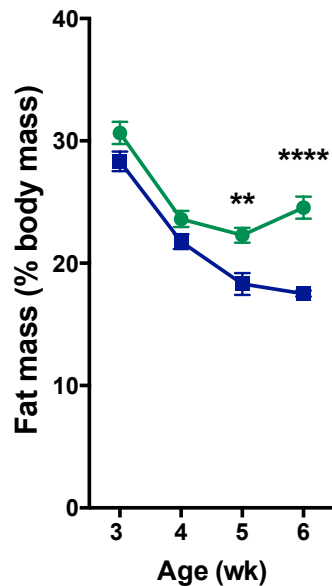**E**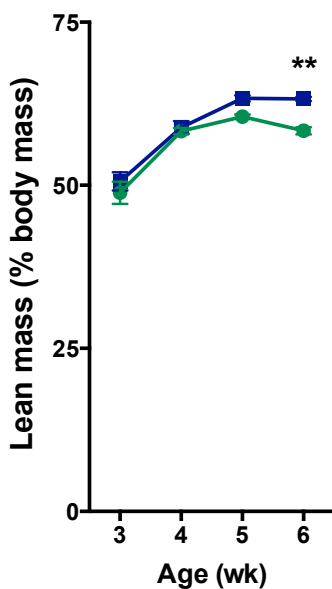**F**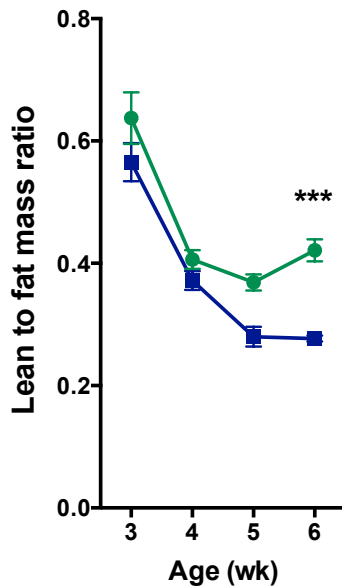

Supplement: mmc2.pdf [file mmc2.pdf]

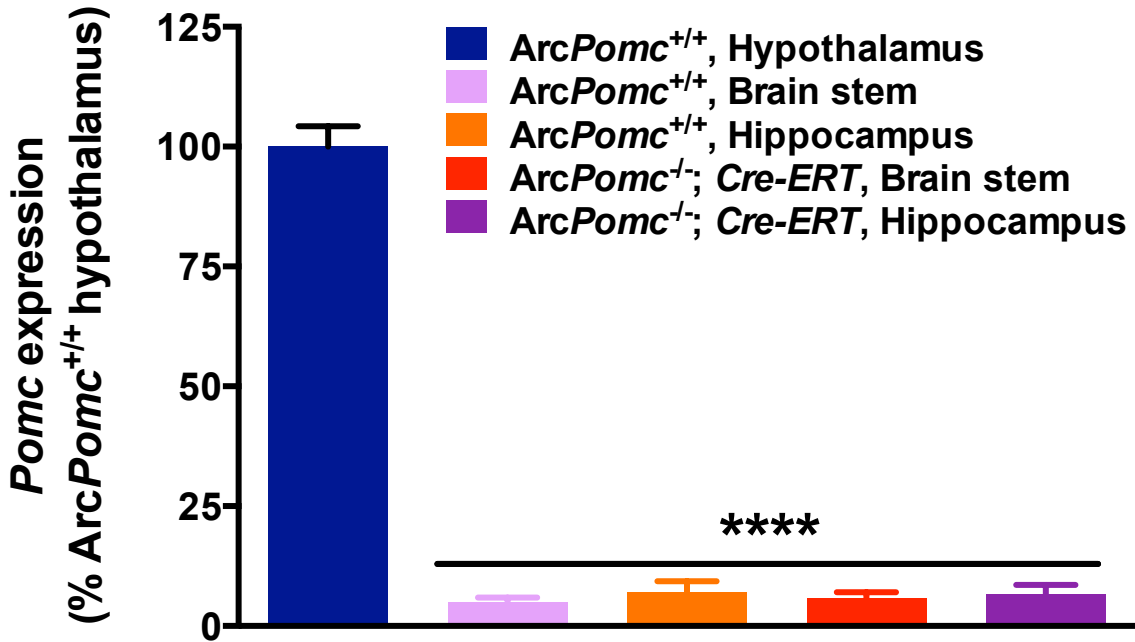

Supplement: mmc3.pdf [file mmc3.pdf]
